# Supplementary material for: Insights into nitrogen fixation below the euphotic zone: trials in an oligotrophic marginal sea and global compilation
Source: Copernicus journal article supplement (doi:10.5194/bg-2021-104), 2021-04-23
Supplement: Supplementary file 1 [file bg-2021-104-supplement.zip]

# Insights into nitrogen fixation below the euphotic zone: trials in an oligotrophic marginal sea and global compilation

Siqi Wu<sup>1,2</sup>, Moge Du<sup>1,2</sup>, Xianhui Sean Wan<sup>1,3</sup>, Corday Selden<sup>4</sup>, Mar Benavides<sup>5</sup>, Sophie Bonnet<sup>5</sup>, Robert Hamersley<sup>6</sup>, Carolin R. Löscher<sup>7,8</sup>, Margaret R. Mulholland<sup>4</sup>, Xiuli Yan<sup>9</sup>, Shuh-Ji Kao<sup>1,2,10</sup>

- 5
- <sup>1</sup>State Key Laboratory of Marine Environmental Science, Xiamen University, Xiamen, 361102, China  
<sup>2</sup>College of Ocean and Earth Sciences, Xiamen University, Xiamen, 361102, China  
<sup>3</sup>Department of Geosciences, Princeton University, Princeton, NJ 08544, USA  
<sup>4</sup>Department of Ocean & Earth Sciences, Old Dominion University, Norfolk, VA 23529, USA  
<sup>5</sup>Aix Marseille Univ., Université de Toulon, CNRS, IRD, MIO UM 110, Marseille, 13288, France
- 10
- <sup>6</sup>Environmental Studies, Soka University of America, Aliso Viejo, 92656, USA  
<sup>7</sup>Nordcee, Department of Biology, University of Southern Denmark, Odense, DK-5230, Denmark  
<sup>8</sup>D-IAS, University of Southern Denmark, Odense, DK-5230, Denmark  
<sup>9</sup>Marine Science Institute and Guangdong Provincial Key Laboratory of Marine Biotechnology College of Science, Shantou University, Shantou, 515063, China
- 15
- <sup>10</sup>State Key Laboratory of Marine Resources Utilization in South China Sea, Hainan University, Haikou, 570228, China

Correspondence to: Shuh-ji Kao (sjkao@xmu.edu.cn)

## Supplemental information

20

**Table S1. Statistical information for log-transformed linear regressions of aphotic N<sub>2</sub> fixation (ANF) and particulate nitrogen (PN) concentration, ANF and specific N<sub>2</sub> fixation rate (SNFR), SNFR and PN concentration in different study areas, calculated via SPSS Statistics. *n*: sample size; *r*: correlation coefficient; *F*: *F* value for *F*-test, *p*: significance; SW: *Shapiro-Wilk* test for residual normality. Asterisks represent significant regressions (*p* < 0.05).**

| Location                                                                                | <i>n</i> | log <sub>10</sub> (ANF) vs. log <sub>10</sub> (PN) |          |          |      | log <sub>10</sub> (ANF) vs. log <sub>10</sub> (SNFR) |          |          |      | log <sub>10</sub> (SNFR) vs. log <sub>10</sub> (PN) |          |          |      |
|-----------------------------------------------------------------------------------------|----------|----------------------------------------------------|----------|----------|------|------------------------------------------------------|----------|----------|------|-----------------------------------------------------|----------|----------|------|
|                                                                                         |          | <i>r</i>                                           | <i>F</i> | <i>p</i> | SW   | <i>r</i>                                             | <i>F</i> | <i>p</i> | SW   | <i>r</i>                                            | <i>F</i> | <i>p</i> | SW   |
| <b>Southern California Bight</b><br>(Hamersley et al., 2011)                            | 14       | 0.35                                               | 1.71     | 0.22     | 0.42 | 0.95                                                 | 121.90   | *0.00    | 0.08 | 0.62                                                | 7.37     | *0.02    | 0.42 |
| <b>Eastern Tropical South Pacific</b><br>(Bonnet et al., 2013;<br>Löscher et al., 2016) | 33       | 0.47                                               | 8.98     | *0.01    | 0.04 | 0.94                                                 | 234.44   | *0.00    | 0.00 | 0.19                                                | 1.17     | 0.29     | 0.15 |
| <b>Mediterranean Sea</b><br>(Benavides et al., 2016)                                    | 10       | 0.35                                               | 1.10     | 0.33     | 0.07 | 0.49                                                 | 2.47     | 0.16     | 0.95 | 0.65                                                | 5.90     | *0.04    | 0.07 |
| <b>Western Tropical South Pacific</b><br>(Benavides et al., 2018)                       | 59       | 0.06                                               | 0.23     | 0.64     | 0.00 | 0.82                                                 | 117.32   | *0.00    | 0.73 | 0.62                                                | 36.02    | *0.00    | 0.00 |
| <b>Eastern Tropical North Pacific</b><br>(Selden et al., 2019)                          | 8        | 0.61                                               | 3.52     | 0.11     | 0.05 | 0.89                                                 | 23.20    | *0.00    | 0.79 | 0.23                                                | 0.35     | 0.58     | 0.14 |
| <b>South China Sea (This study)</b>                                                     | 11       | 0.73                                               | 10.28    | *0.01    | 0.77 | 0.96                                                 | 95.02    | *0.00    | 0.80 | 0.51                                                | 3.21     | 0.11     | 0.52 |

**Table S2. Amino acid addition effects on ANF below the euphotic zone.**

| Location                          | Depth                               | DOM Addition Type                                                    | Final                                | Effect on ANF                         | Reference              |
|-----------------------------------|-------------------------------------|----------------------------------------------------------------------|--------------------------------------|---------------------------------------|------------------------|
|                                   |                                     |                                                                      | Concentration<br>( $\mu\text{M C}$ ) |                                       |                        |
| Gulf of Aqaba                     | 160-720 m                           | Amino Acid Mixture<br>(Sigma A9906)                                  | 0.5                                  | 1.5-2 fold increase                   | Rahav et al., 2013     |
| Eastern Tropical<br>South Pacific | OMZ core<br>(between 140-<br>475 m) | Amino Acid (20 %<br>leucine, 23 %<br>glutamic acid, 56 %<br>alanine) | 4                                    | 4-7 fold increase                     | Bonnet et al., 2013    |
| Gulf of Aqaba                     | 160 m                               | DCMU+Amino Acid<br>Mixture (Sigma<br>A9906)                          | 0.5                                  | 2-4 fold increase                     | Rahav et al., 2015     |
| Solomon seas                      | 300-400 m                           | 20 % leucine, 23 %<br>glutamic acid, 56 %<br>alanine                 | 4.03                                 | 0-2 fold increase                     | Benavides et al., 2015 |
| Bismarck Seas                     | 300-400 m                           | 20 % leucine, 23 %<br>glutamic acid, 56 %<br>alanine                 | 4.03                                 | 0-2 fold increase                     | Benavides et al., 2015 |
| Eastern Tropical<br>North Pacific | 135-205 m                           | 20 amino acid<br>mixture (Cambridge<br>Isotope)                      | 40                                   | Decrease to increase                  | Selden et al., 2019    |
| Eastern Tropical<br>North Pacific | 500-2000 m                          | 20 amino acid<br>mixture (Cambridge<br>Isotope)                      | 40                                   | 0 to decreased                        | Selden et al., 2019    |
| South China Sea                   | 200-855m                            | 17 % glutamic acid,<br>50 % glycine, 33 %<br>alanine                 | 0.2; 0.4; 2; 10;<br>20               | Decrease to around 3<br>fold increase | This Study             |

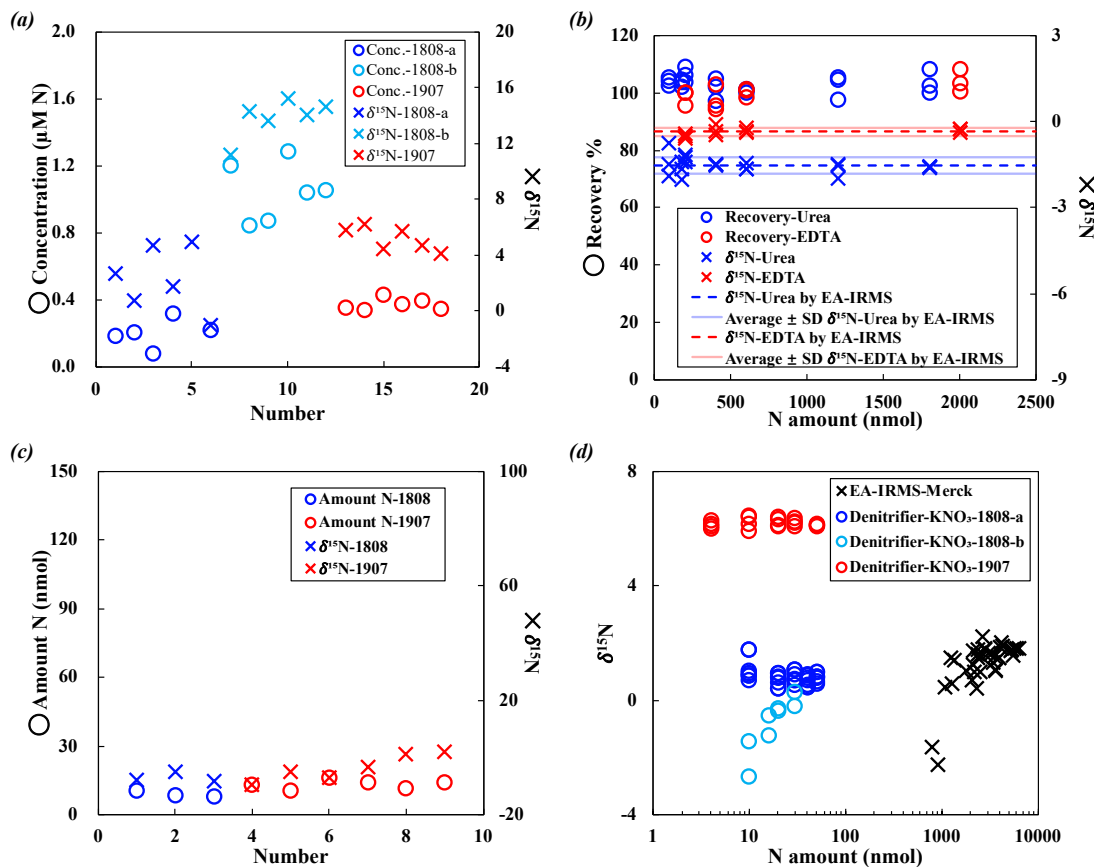

Figure S1. (a) Concentrations (circles) and isotopic composition (crosses) of blanks of alkaline persulfate oxidation method. 3 batches are shown in different colours (blue, red and green). (b) Recovery rates (circles) and isotopic composition (crosses) of known amounts of urea (blue) and EDTA (red). Blue and red dotted lines represent the  $\delta^{15}\text{N}$  value of urea and EDTA obtained via EA-IRMS, respectively. (c) Nitrogen amount (circles) and isotopic composition (crosses) of filter blanks (25 mm GF75) in August 2018 (blue) and July 2019 (red) cruises. (d) N amount needed to attain stable  $\delta^{15}\text{N}$  value via EA-IRMS (crosses) and denitrifier method (circles). For EA-IRMS, Acetanilide from Merck were used and  $\text{KNO}_3$  (XiLong SCIENTIFIC) was used for denitrifier method. Circles in different colours represent different batches of analysis.

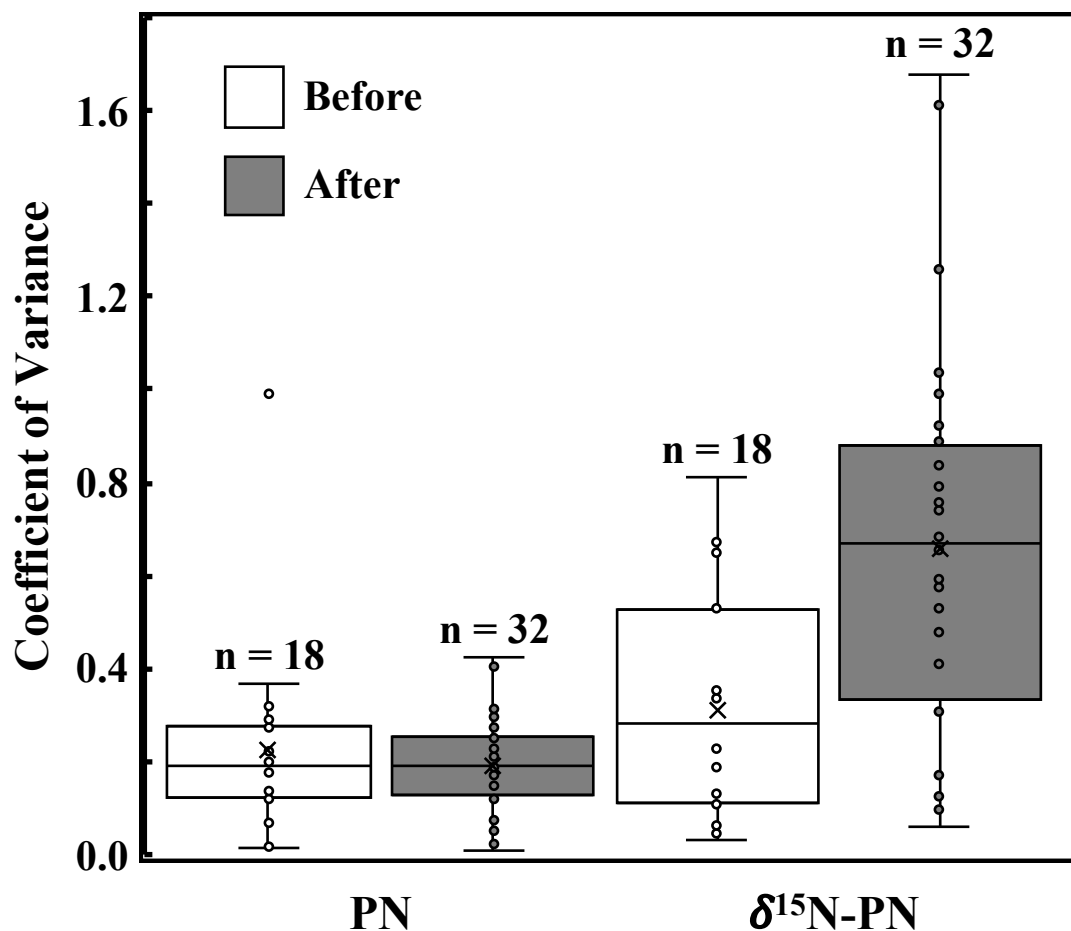

Figure S2. Coefficient of variance (CV) of PN concentration and  $\delta^{15}\text{N-PN}$  in replicates before and after  $^{15}\text{N}_2$  tracer incubation. Boxes represent the 25–75 % quantile range, with the center line depicting the median (50 % quantile); bars encompass data points within 1.5× the interquartile range. CVs are shown as points. Crosses represent mean CV values in each group.

## References

Benavides, M., Moisander, P. H., Berthelot, H., Dittmar, T., Grosso, O., and Bonnet, S.: Mesopelagic  $\text{N}_2$  Fixation Related to Organic Matter Composition in the Solomon and Bismarck Seas (Southwest Pacific)., Plos One, 10, e0143775, <https://doi.org/10.1371/journal.pone.0143775>, 2015.

- 45 Benavides, M., Bonnet, S., Hernández, N., Martínez-Pérez, A. M., Nieto-Cid, M., Álvarez-Salgado, X. A., Baños, I.,  
Montero, M. F., Mazuecos, I. P., Gasol, J. M., Osterholz, H., Dittmar, T., Berman-Frank, I., and Arístegui, J.: Basin-wide N<sub>2</sub>  
fixation in the deep waters of the Mediterranean Sea, *Global. Biogeochem. Cy.*, 30, 952–961,  
<https://doi.org/10.1002/2015gb005326>, 2016.
- Benavides, M., Shoemaker, K. M., Moisander, P. H., Niggemann, J., Dittmar, T., Duhamel, S., Grosso, O., Pujo-Pay, M.,  
50 Hélias-Nunige, S., Fumenia, A., and Bonnet, S.: Aphotic N<sub>2</sub> fixation along an oligotrophic to ultraoligotrophic transect in the  
western tropical South Pacific Ocean, *Biogeosciences*, 15, 3107–3119, <https://doi.org/10.5194/bg-15-3107-2018>, 2018.
- Bonnet, S., Dekaezemacker, J., Turk-Kubo, K. A., Moutin, T., Hamersley, R. M., Grosso, O., Zehr, J. P., and Capone, D. G.:  
Aphotic N<sub>2</sub> Fixation in the Eastern Tropical South Pacific Ocean, *Plos One*, 8, e81265,  
<https://doi.org/10.1371/journal.pone.0081265>, 2013.
- 55 Hamersley, M., Turk, K., Leinweber, A., Gruber, N., Zehr, J., Gunderson, T., and Capone, D.: Nitrogen fixation within the  
water column associated with two hypoxic basins in the Southern California Bight, *Aquat. Microb. Ecol.*, 63, 193–205,  
<https://doi.org/10.3354/ame01494>, 2011.
- Löscher, C. R., Bourbonnais, A., Dekaezemacker, J., Charoenpong, C. N., Altabet, M. A., Bange, H. W., Czeschel, R.,  
Hoffmann, C., and Schmitz, R.: N<sub>2</sub> fixation in eddies of the eastern tropical South Pacific Ocean, *Biogeosciences*, 13, 2889–  
60 2899, <https://doi.org/10.5194/bg-13-2889-2016>, 2016.
- Rahav, E., Bar-Zeev, E., Ohayon, S., Elifantz, H., Belkin, N., Herut, B., Mulholland, M. R., and Berman-Frank, I.:  
Dinitrogen fixation in aphotic oxygenated marine environments, *Front. Microbiol.*, 4, 227,  
<https://doi.org/10.3389/fmicb.2013.00227>, 2013.
- Rahav, E., Herut, B., Mulholland, M., Belkin, N., Elifantz, H., and Berman-Frank, I.: Heterotrophic and autotrophic  
65 contribution to dinitrogen fixation in the Gulf of Aqaba, *Mar. Ecol. Prog. Ser.*, 522, 67–77,  
<https://doi.org/10.3354/meps11143>, 2015.
- Selden, C. R., Mulholland, M. R., Bernhardt, P. W., Widner, B., Macías-Tapia, A., Ji, Q., and Jayakumar, A.: Dinitrogen  
Fixation Across Physico-Chemical Gradients of the Eastern Tropical North Pacific Oxygen Deficient Zone, *Global  
Biogeochem. Cy.*, 33, 1187–1202, <https://doi.org/10.1029/2019gb006242>, 2019.
