# Supplementary material for: Insights into nitrogen fixation below the euphotic zone: trials in an oligotrophic marginal sea and global compilation
Source: Copernicus journal article supplement (doi:10.5194/bg-2021-104), 2021-04-23
Supplement: Supplementary file 1 [file Supplemental information-2.xlsx]

## Sheet: Table S2
Table S2. Original data used in compilation (Table 2). Note that specific N2 fixation rates (SNFR) were calculated as the aphotic N2 fixation (ANF) rate divided by PN concentration in Hamersley et al., 2011; Bonnet et al., 2013; Löscher et al., 2016; Benavides et al., 2016 and 2018, and others were calculated using Equation (1). Particulate nitrogen (PN) concentrations in Selden et al., 2019 used…
Reference	Cruise	Date	Area	Station	Depth (m)	PN concentration (µmol L-1)	ANF rate (nmol N L-1 d-1)	SNFR (× 10-3 d-1)
Hamersley et al., 2011		2005-04-20 15:30:00	Southern California Bight	SPOTS	800	0.218855	0.201987	0.92293
Hamersley et al., 2011		2005-06-14 15:30:00	Southern California Bight	SPOTS	800	0.251935	0.0907817	0.360338
Hamersley et al., 2011		2005-12-13	Southern California Bight	SPOTS	500	0.0671483	0.239603	3.56826
Hamersley et al., 2011		2005-12-13	Southern California Bight	SPOTS	885	0.2286	0.129532	0.566633
Hamersley et al., 2011		2006-01-18	Southern California Bight	SPOTS	500	0.0836901	0.0488169	0.583306
Hamersley et al., 2011		2006-02-22	Southern California Bight	SPOTS	885	0.236338	0.0699683	0.296052
Hamersley et al., 2011		2006-03-29	Southern California Bight	SPOTS	500	0.316872	0.0221455	0.0698879
Hamersley et al., 2011		2006-03-29	Southern California Bight	SPOTS	885	0.106785	0.0382969	0.358635
Hamersley et al., 2011		2006-07-25	Southern California Bight	SPOTS	500	0.217128	0.0195609	0.0900893
Hamersley et al., 2011		2006-07-25	Southern California Bight	SPOTS	885	0.160262	0.0544636	0.33984
Hamersley et al., 2011		2006-08-24	Southern California Bight	SPOTS	500	0.217921	0.0793795	0.364258
Hamersley et al., 2011		2006-08-24	Southern California Bight	SPOTS	885	0.223244	0.0127885	0.0572847
Hamersley et al., 2011		2006-09-13	Southern California Bight	SPOTS	500	0.289589	0.0189494	0.0654353
Hamersley et al., 2011		2006-09-13	Southern California Bight	SPOTS	885	0.233714	0.0022888	0.00979318
Bonnet et al., 2013	2011	Mar 2011 to Apr 2011	Eastern Tropical South Pacific	5	300	0.138148	0.000197058	0.00164639
Bonnet et al., 2013	2011	Mar 2011 to Apr 2011	Eastern Tropical South Pacific	5	350	0.148571	0.0184389	0.12081
Bonnet et al., 2013	2011	Mar 2011 to Apr 2011	Eastern Tropical South Pacific	5	390	0.211276	0.0195958	0.111202
Bonnet et al., 2013	2011	Mar 2011 to Apr 2011	Eastern Tropical South Pacific	5	550	0.161433	0.0122775	0.0450064
Bonnet et al., 2013	2011	Mar 2011 to Apr 2011	Eastern Tropical South Pacific	5	850	0.179653	0.0211896	0.122831
Bonnet et al., 2013	2011	Mar 2011 to Apr 2011	Eastern Tropical South Pacific	5	1000	0.167557	0.00819339	0.0345542
Bonnet et al., 2013	2011	Mar 2011 to Apr 2011	Eastern Tropical South Pacific	5	1500	0.149442	0.00315223	0.0247213
Bonnet et al., 2013	2011	Mar 2011 to Apr 2011	Eastern Tropical South Pacific	5	2000	0.170851	0.0268489	0.139244
Bonnet et al., 2013	2011	Mar 2011 to Apr 2011	Eastern Tropical South Pacific	6	200	0.451823	0.0275844	0.0606864
Bonnet et al., 2013	2011	Mar 2011 to Apr 2011	Eastern Tropical South Pacific	6	350	0.40916	0.00369018	0.00988213
Bonnet et al., 2013	2011	Mar 2011 to Apr 2011	Eastern Tropical South Pacific	6	500	0.29026	0.041028	0.140374
Bonnet et al., 2013	2011	Mar 2011 to Apr 2011	Eastern Tropical South Pacific	6	800	0.244882	0.0356347	0.137007
Bonnet et al., 2013	2011	Mar 2011 to Apr 2011	Eastern Tropical South Pacific	6	1000	0.37893	0.0104264	0.014211
Bonnet et al., 2013	2011	Mar 2011 to Apr 2011	Eastern Tropical South Pacific	6	1500	0.170706	0.0146136	0.0832666
Bonnet et al., 2013	2011	Mar 2011 to Apr 2011	Eastern Tropical South Pacific	6	2000	0.189526	0.00309651	0.0195774
Bonnet et al., 2013	2011	Mar 2011 to Apr 2011	Eastern Tropical South Pacific	7	250	0.223623	0.0173253	0.0695631
Bonnet et al., 2013	2011	Mar 2011 to Apr 2011	Eastern Tropical South Pacific	7	400	0.188341	0.0415366	0.217125
Bonnet et al., 2013	2011	Mar 2011 to Apr 2011	Eastern Tropical South Pacific	7	540	0.205724	0.0208101	0.132196
Bonnet et al., 2013	2011	Mar 2011 to Apr 2011	Eastern Tropical South Pacific	7	680	0.216616	0.0309759	0.140588
Bonnet et al., 2013	2011	Mar 2011 to Apr 2011	Eastern Tropical South Pacific	7	2000	0.316596	0.0434616	0.0968284
Bonnet et al., 2013	2011	Mar 2011 to Apr 2011	Eastern Tropical South Pacific	9	200	0.264352	0.00196219	0.0109185
Bonnet et al., 2013	2011	Mar 2011 to Apr 2011	Eastern Tropical South Pacific	9	450	0.280966	0.0028533	0.0192458
Bonnet et al., 2013	2011	Mar 2011 to Apr 2011	Eastern Tropical South Pacific	9	730	0.123916	0.00192942	0.016504
Bonnet et al., 2013	2011	Mar 2011 to Apr 2011	Eastern Tropical South Pacific	9	1000	0.295748	0.205671	0.657641
Bonnet et al., 2013	2011	Mar 2011 to Apr 2011	Eastern Tropical South Pacific	9	1500	0.419223	0.046666	0.153449
Bonnet et al., 2013	2011	Mar 2011 to Apr 2011	Eastern Tropical South Pacific	9	2000	0.869504	0.217184	0.114687
Bonnet et al., 2013	2011	Mar 2011 to Apr 2011	Eastern Tropical South Pacific	11	475	0.245712	0.00185193	0.00869603
Bonnet et al., 2013	2011	Mar 2011 to Apr 2011	Eastern Tropical South Pacific	11	600	0.286058	0.0366962	0.118756
Bonnet et al., 2013	2011	Mar 2011 to Apr 2011	Eastern Tropical South Pacific	11	700	0.130312	0.000358914	0.00246345
Bonnet et al., 2013	2011	Mar 2011 to Apr 2011	Eastern Tropical South Pacific	11	900	0.217229	0.0361496	0.159523
Bonnet et al., 2013	2011	Mar 2011 to Apr 2011	Eastern Tropical South Pacific	11	1500	0.141859	0.0234419	0.162383
Löscher et al., 2016	M90	2012-11-01	Eastern Tropical South Pacific	1555	319.08	0.493288	0.132	0.267592
Löscher et al., 2016	M90	2012-11-17	Eastern Tropical South Pacific	1646	377.67	0.157656	0.125	0.792865
Benavides et al., 2016	HOTMIX	2014/4/27-2014/5/29	Mediterranean Sea	H01	2000	0.225826	0.0132972	0.0588824
Benavides et al., 2016	HOTMIX	2014/4/27-2014/5/29	Mediterranean Sea	H01	1000	0.206672	0.0387967	0.187721
Benavides et al., 2016	HOTMIX	2014/4/27-2014/5/29	Mediterranean Sea	H04	2000	0.0363851	0.0280954	0.772169
Benavides et al., 2016	HOTMIX	2014/4/27-2014/5/29	Mediterranean Sea	H04	1250	0.0290383	0.0160968	0.554329
Benavides et al., 2016	HOTMIX	2014/4/27-2014/5/29	Mediterranean Sea	H07	2000	0.0266769	0.00463623	0.173792
Benavides et al., 2016	HOTMIX	2014/4/27-2014/5/29	Mediterranean Sea	H07	1000	0.0269392	0.0198357	0.736311
Benavides et al., 2016	HOTMIX	2014/4/27-2014/5/29	Mediterranean Sea	H10	1000	0.0361729	0.00532067	0.14709
Benavides et al., 2016	HOTMIX	2014/4/27-2014/5/29	Mediterranean Sea	H15	2000	0.0384261	0.0233262	0.607041
Benavides et al., 2016	HOTMIX	2014/4/27-2014/5/29	Mediterranean Sea	H18	2000	0.0403769	0.00825321	0.204404
Benavides et al., 2016	HOTMIX	2014/4/27-2014/5/29	Mediterranean Sea	H18	1000	0.0325727	0.0173472	0.532568
Benavides et al., 2018	OUTPACE	2015/2/20-2015/4/2	Western Tropical South Pacific	1	650	0.0564281	0.663687	11.7616
Benavides et al., 2018	OUTPACE	2015/2/20-2015/4/2	Western Tropical South Pacific	1	800	0.0487506	0.422187	8.66013
Benavides et al., 2018	OUTPACE	2015/2/20-2015/4/2	Western Tropical South Pacific	2	800	0.0496536	0.0543824	1.09524
Benavides et al., 2018	OUTPACE	2015/2/20-2015/4/2	Western Tropical South Pacific	2	650	0.0617431	0.0837074	1.35574
Benavides et al., 2018	OUTPACE	2015/2/20-2015/4/2	Western Tropical South Pacific	2	500	0.0539234	0.121174	2.24715
Benavides et al., 2018	OUTPACE	2015/2/20-2015/4/2	Western Tropical South Pacific	2	200	0.0506645	0.162567	3.2087
Benavides et al., 2018	OUTPACE	2015/2/20-2015/4/2	Western Tropical South Pacific	3	650	0.0249066	0.0780761	3.13476
Benavides et al., 2018	OUTPACE	2015/2/20-2015/4/2	Western Tropical South Pacific	3	800	0.0171089	0.052182	3.04999
Benavides et al., 2018	OUTPACE	2015/2/20-2015/4/2	Western Tropical South Pacific	3	650	0.0288025	0.0780761	2.71074
Benavides et al., 2018	OUTPACE	2015/2/20-2015/4/2	Western Tropical South Pacific	3	800	0.0241515	0.052182	2.16061
Benavides et al., 2018	OUTPACE	2015/2/20-2015/4/2	Western Tropical South Pacific	3	200	0.0802463	0.162567	2.02585
Benavides et al., 2018	OUTPACE	2015/2/20-2015/4/2	Western Tropical South Pacific	3	500	0.0531873	0.121174	2.27825
Benavides et al., 2018	OUTPACE	2015/2/20-2015/4/2	Western Tropical South Pacific	4	650	0.0538539	0.0808953	1.50213
Benavides et al., 2018	OUTPACE	2015/2/20-2015/4/2	Western Tropical South Pacific	4	800	0.0676135	0.0808953	1.19644
Benavides et al., 2018	OUTPACE	2015/2/20-2015/4/2	Western Tropical South Pacific	4	200	0.101055	0.178459	1.76595
Benavides et al., 2018	OUTPACE	2015/2/20-2015/4/2	Western Tropical South Pacific	4	500	0.0692678	0.152818	2.20619
Benavides et al., 2018	OUTPACE	2015/2/20-2015/4/2	Western Tropical South Pacific	5	200	0.086574	0.173162	2.00017
Benavides et al., 2018	OUTPACE	2015/2/20-2015/4/2	Western Tropical South Pacific	5	500	0.0550798	0.136324	2.47502
Benavides et al., 2018	OUTPACE	2015/2/20-2015/4/2	Western Tropical South Pacific	5	650	0.0324189	0.257773	7.95133
Benavides et al., 2018	OUTPACE	2015/2/20-2015/4/2	Western Tropical South Pacific	5	800	0.022633	0.161349	7.1289
Benavides et al., 2018	OUTPACE	2015/2/20-2015/4/2	Western Tropical South Pacific	6	200	0.0816253	0.115363	1.41332
Benavides et al., 2018	OUTPACE	2015/2/20-2015/4/2	Western Tropical South Pacific	6	500	0.0384619	0.0841033	2.18667
Benavides et al., 2018	OUTPACE	2015/2/20-2015/4/2	Western Tropical South Pacific	6	650	0.0410573	0.0903306	2.20011
Benavides et al., 2018	OUTPACE	2015/2/20-2015/4/2	Western Tropical South Pacific	6	800	0.0396399	0.133253	3.36158
Benavides et al., 2018	OUTPACE	2015/2/20-2015/4/2	Western Tropical South Pacific	7	200	0.0798938	0.159061	1.9909
Benavides et al., 2018	OUTPACE	2015/2/20-2015/4/2	Western Tropical South Pacific	7	500	0.0576423	0.114648	1.98896
Benavides et al., 2018	OUTPACE	2015/2/20-2015/4/2	Western Tropical South Pacific	7	650	0.0348826	0.105954	3.03746
Benavides et al., 2018	OUTPACE	2015/2/20-2015/4/2	Western Tropical South Pacific	7	800	0.0511302	0.102631	2.00725
Benavides et al., 2018	OUTPACE	2015/2/20-2015/4/2	Western Tropical South Pacific	8	200	0.0929176	0.129312	1.39169
Benavides et al., 2018	OUTPACE	2015/2/20-2015/4/2	Western Tropical South Pacific	8	500	0.0570132	0.0872197	1.52982
Benavides et al., 2018	OUTPACE	2015/2/20-2015/4/2	Western Tropical South Pacific	8	650	0.0502199	0.122945	2.44814
Benavides et al., 2018	OUTPACE	2015/2/20-2015/4/2	Western Tropical South Pacific	8	800	0.0523562	0.0701719	1.34028
Benavides et al., 2018	OUTPACE	2015/2/20-2015/4/2	Western Tropical South Pacific	9	200	0.0351593	0.150528	4.28131
Benavides et al., 2018	OUTPACE	2015/2/20-2015/4/2	Western Tropical South Pacific	9	650	0.0349072	0.0810495	2.32185
Benavides et al., 2018	OUTPACE	2015/2/20-2015/4/2	Western Tropical South Pacific	9	800	0.0320216	0.125354	3.91468
Benavides et al., 2018	OUTPACE	2015/2/20-2015/4/2	Western Tropical South Pacific	10	200	0.0921869	0.181104	1.96453
Benavides et al., 2018	OUTPACE	2015/2/20-2015/4/2	Western Tropical South Pacific	10	500	0.0757009	0.107179	1.41582
Benavides et al., 2018	OUTPACE	2015/2/20-2015/4/2	Western Tropical South Pacific	10	650	0.0650384	0.122462	1.88292
Benavides et al., 2018	OUTPACE	2015/2/20-2015/4/2	Western Tropical South Pacific	10	800	0.0339542	0.0986816	2.90631
Benavides et al., 2018	OUTPACE	2015/2/20-2015/4/2	Western Tropical South Pacific	11	200	0.0879445	0.132609	1.50788
Benavides et al., 2018	OUTPACE	2015/2/20-2015/4/2	Western Tropical South Pacific	11	500	0.0395396	0.121943	3.08407
Benavides et al., 2018	OUTPACE	2015/2/20-2015/4/2	Western Tropical South Pacific	11	650	0.0454736	0.113852	2.5037
Benavides et al., 2018	OUTPACE	2015/2/20-2015/4/2	Western Tropical South Pacific	11	800	0.0223086	0.117942	5.28683
Benavides et al., 2018	OUTPACE	2015/2/20-2015/4/2	Western Tropical South Pacific	12	200	0.0774787	0.243205	3.139
Benavides et al., 2018	OUTPACE	2015/2/20-2015/4/2	Western Tropical South Pacific	12	500	0.037108	0.145622	3.92428
Benavides et al., 2018	OUTPACE	2015/2/20-2015/4/2	Western Tropical South Pacific	12	650	0.0345274	0.134757	3.9029
Benavides et al., 2018	OUTPACE	2015/2/20-2015/4/2	Western Tropical South Pacific	12	800	0.0279733	0.0833065	2.97807
Benavides et al., 2018	OUTPACE	2015/2/20-2015/4/2	Western Tropical South Pacific	13	200	0.0273314	0.529535	19.3746
Benavides et al., 2018	OUTPACE	2015/2/20-2015/4/2	Western Tropical South Pacific	13	500	0.0383584	0.682059	17.7812
Benavides et al., 2018	OUTPACE	2015/2/20-2015/4/2	Western Tropical South Pacific	13	650	0.015344	0.64748	42.1976
Benavides et al., 2018	OUTPACE	2015/2/20-2015/4/2	Western Tropical South Pacific	13	800	0.0243889	0.674824	27.6693
Benavides et al., 2018	OUTPACE	2015/2/20-2015/4/2	Western Tropical South Pacific	14	200	0.0738573	0.173578	2.35018
Benavides et al., 2018	OUTPACE	2015/2/20-2015/4/2	Western Tropical South Pacific	14	500	0.0521302	0.0590991	1.13368
Benavides et al., 2018	OUTPACE	2015/2/20-2015/4/2	Western Tropical South Pacific	14	650	0.0424788	0.104017	2.44869
Benavides et al., 2018	OUTPACE	2015/2/20-2015/4/2	Western Tropical South Pacific	14	800	0.0400406	0.0657916	1.64312
Benavides et al., 2018	OUTPACE	2015/2/20-2015/4/2	Western Tropical South Pacific	15	200	0.0775444	0.0861393	1.11084
Benavides et al., 2018	OUTPACE	2015/2/20-2015/4/2	Western Tropical South Pacific	15	500	0.0271894	0.127176	4.67742
Benavides et al., 2018	OUTPACE	2015/2/20-2015/4/2	Western Tropical South Pacific	15	650	0.0432443	0.210534	4.86847
Benavides et al., 2018	OUTPACE	2015/2/20-2015/4/2	Western Tropical South Pacific	15	800	0.0236996	0.192774	8.1341
Selden et al., 2019		2016-04-01	Eastern Tropical North Pacific	9	135	0.200456	1.55	7.80416
Selden et al., 2019		2016-04-01	Eastern Tropical North Pacific	9	1000	0.123066	0.87	10.4527
Selden et al., 2019		2016-04-01	Eastern Tropical North Pacific	15	174	0.136927	1.01	17.9912
Selden et al., 2019		2016-04-01	Eastern Tropical North Pacific	16	184	0.104718	9.88	94.3556
Selden et al., 2019		2016-04-01	Eastern Tropical North Pacific	16	200	0.169173	35.9	212.19
Selden et al., 2019		2016-04-01	Eastern Tropical North Pacific	16	1000	0.182787	2.37	12.9883
Selden et al., 2019		2016-04-01	Eastern Tropical North Pacific	16	2000	0.0330408	0.35	10.6126
Selden et al., 2019		2016-04-01	Eastern Tropical North Pacific	16	3001	0.0284108	0.36	12.7444
This study	Aug 2018 (KK1806)	2018-06-01	South China Sea	SEATS	200	0.0720407	0.0638343	0.980564
This study	Aug 2018 (KK1806)	2018-06-01	South China Sea	SEATS	300	0.0400472	0.0535235	0.605002
This study	Aug 2018 (KK1806)	2018-06-01	South China Sea	SEATS	705	0.00725084	0.0460689	0.161992
This study	Aug 2018 (KK1806)	2018-06-01	South China Sea	SEATS	1000	0.00434099	0.0746788	-
This study	Aug 2018 (KK1806)	2018-06-01	South China Sea	K1	200	0.0672857	0.143779	0.437435
This study	Aug 2018 (KK1806)	2018-06-01	South China Sea	K1	300	0.0328744	0.126807	0.275161
This study	Aug 2018 (KK1806)	2018-06-01	South China Sea	K1	740	0.152729	0.142795	1.41016
This study	Aug 2018 (KK1806)	2018-06-01	South China Sea	K1	1000	0.0381462	0.089396	0.44441
This study	Jul 2019 (KK1905)	2019-07-01	South China Sea	SS1	200	0.0160711	0.0519819	0.263242
This study	Jul 2019 (KK1905)	2019-07-01	South China Sea	SS1	300	0.0172782	0.0592735	0.322736
This study	Jul 2019 (KK1905)	2019-07-01	South China Sea	SS1	700	0.00926752	0.0379705	0.239403
This study	Jul 2019 (KK1905)	2019-07-01	South China Sea	WXS	200	0.00348032	0.0614656	0.0477915
This study	Jul 2019 (KK1905)	2019-07-01	South China Sea	WXS	855	0.00339867	0.0326205	0.0550177

## Sheet: Table S3
Table S3. Original data used for rate calculations. Parameters are explained in the method N2 fixation rate calculation. BDL represents below detection limit.
Station	Depth	Treatment	∆T (d)				AN2				APN0				APNT				[PN]0 nmol N L-1				[PN]T µmol N L-1				Term averaged SNFR	Error	Term Averaged NFR	Error
	m		∆T rep 1	∆T rep 2	∆T rep 3	∆T rep 4	AN2 rep 1	AN2 rep 2	AN2 rep 3	AN2 rep 4	APN0 rep 1	APN0 rep 2	APN0 rep 3	APN0 rep 4	APNT rep 1	APNT rep 2	APNT rep 3	APNT rep 4	[PN]0 rep 1	[PN]0 rep 2	[PN]0 rep 3	[PN]0 rep 4	[PN]T rep 1	[PN]T rep 2	[PN]T rep 3	[PN]T rep 4	× 10-3 d-1	× 10-3 d-1	nmol N L-1 d-1	nmol N L-1 d-1
SEATS	5		0.969444	0.969444	-	-	0.0965558	0.0965558	-	-	0.00365641	0.00364535	-	-	0.00368333	0.00368532	-	-	359.314	308.64	-	-	359.314	308.64	-	-	0.371309	0.0707088	0.124009	0.0715384
SEATS	15		0.976736	0.976736	-	-	0.0962209	0.0962209	-	-	0.0036552	0.00365145	-	-	0.00367968	0.00369786	-	-	524.261	333.727	-	-	524.261	333.727	-	-	0.391989	0.10727	0.168161	0.115612
SEATS	30		0.982986	0.982986	-	-	0.0924801	0.0924801	-	-	0.00365897	0.00365809	-	-	0.0037129	0.00370679	-	-	451.553	440.04	-	-	451.553	440.04	-	-	0.587667	0.140525	0.26198	0.140579
SEATS	50		0.989931	0.989931	-	-	0.0908976	0.0908976	-	-	0.00366059	0.00365999	-	-	0.00370589	0.00373775	-	-	452.178	522.803	-	-	452.178	522.803	-	-	0.712499	0.224927	0.347336	0.226796
SEATS	75		0.996528	0.996528	-	-	0.0876842	0.0876842	-	-	0.00366275	0.00366393	-	-	0.00369336	0.00376833	-	-	876.154	577.997	-	-	876.154	577.997	-	-	0.806203	0.559868	0.58617	0.576812
SEATS	100		1.00417	1.00417	-	-	0.08436	0.08436	-	-	0.00366272	0.00366143	-	-	0.00368492	0.00374123	-	-	316.807	284.682	-	-	316.807	284.682	-	-	0.629391	0.181173	0.189286	0.181548
SEATS	200	HgCl2-48h	2.04653	2.04653	-	-	0.0762877	0.0762877	-	-	0.0036932	0.00370765	-	-	0.00370873	0.00369938	-	-	54.9328	53.811	-	-	50.3145	42.7416	-	-	BDL	-	BDL	-
SEATS	200	HgCl2-96h	3.96458	3.96458	-	-	0.0762877	0.0762877	-	-	0.0036932	0.00370765	-	-	0.00371602	0.00369977	-	-	54.9328	53.811	-	-	63.3812	39.7289	-	-
SEATS	200	48h	2.06562	2.06562	2.07118	2.07118	0.0649792	0.0867383	0.0867383	0.0867383	0.00370973	0.00371075	0.00375422	0.00370628	0.00369428	0.00476924	0.00371095	0.00370914	65.5612	51.0657	66.1479	66.7369	119.977	60.334	78.8172	65.3731	1.087	0.136496	0.0817151	0.137927
SEATS	200	96h	3.98056	3.98056	3.98819	3.98819	0.0867383	0.0867383	0.0867383	0.0867383	0.00370973	0.00371075	0.00375422	0.00370628	0.00370448	0.00370268	0.00457369	0.00370973	65.5612	51.0657	66.1479	66.7369	106.631	77.0055	137.973	99.0524
SEATS	300	HgCl2-48h	2.10799	2.10799	-	-	0.073055	0.073055	-	-	0.00370085	0.00371798	-	-	0.00371414	0.00370629	-	-	38.1811	42.7865	-	-	43.6587	43.4197	-	-	BDL	-	BDL	-
SEATS	300	HgCl2-96h	4.00833	4.00833	-	-	0.073055	0.073055	-	-	0.00370085	0.00371798	-	-	0.00369712	0.00372729	-	-	38.1811	42.7865	-	-	41.9356	45.8444	-	-
SEATS	300	48h	1.99896	1.99896	2.00833	2.00833	0.0831026	0.0831026	0.0831026	0.0831026	0.00370394	0.00368777	0.00368994	0.00368977	0.0043652	0.00387167	0.00370172	0.00368431	45.5991	46.0692	55.249	60.7939	82.8323	49.9025	79.1729	77.4441	0.663761	0.0639194	0.0397993	0.06474
SEATS	300	96h	3.90521	3.90521	3.9125	3.9125	0.0621935	0.0831026	0.0831026	0.0831026	0.00370394	0.00368777	0.00368994	0.00368977	0.00368446	0.00369803	0.00369176	0.00368514	45.5991	46.0692	55.249	60.7939	50.1157	96.4513	52.136	63.5806
SEATS	705	HgCl2-48h	2.02049	2.02049	-	-	0.0668019	0.0668019	-	-	0.00370713	0.00368928	-	-	0.0038294	0.00371045	-	-	28.03	57.5648	-	-	41.9953	37.014	-	-	0.295887	0.0154914	0.0121342	0.0158787
SEATS	705	HgCl2-96h	4.04028	4.04028	-	-	0.0668019	0.0668019	-	-	0.00370713	0.00368928	-	-	0.00371007	0.00370125	-	-	28.03	57.5648	-	-	33.8563	33.7056	-	-
SEATS	705	48h	2.01701	2.01701	2.02361	2.02361	0.07606	0.07606	0.07606	0.056813	0.00372141	0.00371754	0.00375432	0.00371987	0.00369421	0.00370861	0.00370435	0.00369968	39.6168	46.4026	43.4362	43.4486	61.1548	47.7498	81.9404	58.1395	0.140076	0.0147064	0.00513879	0.0147908
SEATS	705	96h	4.02882	4.02882	4.04132	4.04132	0.07606	0.07606	0.07606	0.07606	0.00372141	0.00371754	0.00375432	0.00371987	0.00372534	0.00391451	0.00373944	0.00408831	39.6168	46.4026	43.4362	43.4486	39.3781	45.2286	43.1514	53.6147
SEATS	1000	HgCl2-48h	2.05833	2.05833	-	-	0.064347	0.064347	-	-	0.0037064	0.00370356	-	-	0.0037103	0.00371121	-	-	31.5597	33.4562	-	-	28.2772	24.4049	-	-	BDL	-	BDL	-
SEATS	1000	HgCl2-96h	3.82188	3.82188	-	-	0.064347	0.064347	-	-	0.0037064	0.00370356	-	-	0.00370564	0.00370449	-	-	31.5597	33.4562	-	-	37.2453	32.7957	-	-
SEATS	1000	48h	2.05208	2.05208	2.0566	2.0566	0.0732917	0.0732917	0.0732917	0.0732917	0.00369539	0.00372428	0.00373663	0.00383756	0.0037488	0.00369917	0.00392263	0.00369776	189.32	36.2399	42.6637	29.2496	63.518	65.8057	51.631	50.0391	BDL	-	BDL	-
SEATS	1000	96h	3.81215	3.81215	3.81944	3.81944	0.0732917	0.0732917	0.0732917	0.0732917	0.00369539	0.00372428	0.00373663	0.00383756	0.00373617	0.00369047	0.00368888	0.00371258	189.32	36.2399	42.6637	29.2496	31.2135	34.3758	30.1006	50.5956
SEATS	2000	HgCl2-48h	1.80417	1.80417	-	-	0.0619248	0.0619248	-	-	0.00373171	0.00375231	-	-	0.00372257	0.00370157	-	-	23.9161	24.2821	-	-	20.4301	49.7042	-	-	BDL	-	BDL	-
SEATS	2000	HgCl2-96h	3.61076	3.61076	-	-	0.0619248	0.0619248	-	-	0.00373171	0.00375231	-	-	0.00379737	0.00371747	-	-	23.9161	24.2821	-	-	29.3833	23.4853	-	-
SEATS	2000	48h	1.79375	1.79375	1.80208	1.80208	0.0705581	0.0705581	0.0705581	0.0705581	0.00373273	0.00371303	0.00372604	0.00372637	0.00369526	0.00368842	0.00374479	0.00368899	32.3208	22.2424	27.3849	17.1295	45.0676	38.9653	46.047	67.3016	BDL	-	BDL	-
SEATS	2000	96h	3.58715	3.58715	3.59514	3.59514	0.0705581	0.0705581	0.0705581	0.0705581	0.00373273	0.00371303	0.00372604	0.00372637	0.00369823	0.003684	0.0036958	0.00370127	32.3208	22.2424	27.3849	17.1295	28.356	62.3946	28.5947	36.1648
SEATS	3800	HgCl2-48h	2.03993	2.03993	-	-	0.0617288	0.0617288	-	-	0.00372177	0.00372276	-	-	0.00370901	0.0037082	-	-	30.0245	30.2485	-	-	25.2218	32.587	-	-	BDL	-	BDL	-
SEATS	3800	HgCl2-96h	4.03056	4.03056	-	-	0.0617288	0.0617288	-	-	0.00372177	0.00372276	-	-	0.0037122	0.00373597	-	-	30.0245	30.2485	-	-	21.7619	27.6609	-	-
SEATS	3800	48h	2.03698	2.04358	-	2.05122	0.0703369	0.0703369	-	0.0703369	0.00372859	0.00370708	0.00372315	0.00377089	0.00369117	0.00371121	-	0.00367912	45.2677	51.8401	38.1067	39.6887	45.1588	50.6373	-	69.7935	BDL	-	BDL	-
SEATS	3800	96h	4.01302	4.01302	4.02899	4.02899	0.0703369	0.0703369	0.0703369	0.0703369	0.00372859	0.00370708	0.00372315	0.00377089	0.00374104	0.00367657	0.00367549	0.00367926	45.2677	51.8401	38.1067	39.6887	38.3585	30.0948	38.5796	37.1203
K1	5		0.973264	0.973264	-	-	0.0966789	0.0966789	-	-	0.00365641	0.00364535	-	-	0.0036958	0.0036839	-	-	263.97	246.915	-	-	285.228	315.855	-	-	0.430383	0.0713071	0.119643	0.0724446
K1	15		0.96875	0.96875	-	-	0.0964502	0.0964502	-	-	0.0036552	0.00365145	-	-	0.00369145	0.00370265	-	-	285.759	279.443	-	-	337.614	340.864	-	-	0.486362	0.0835861	0.15122	0.0850974
K1	30		0.965972	0.965972	-	-	0.0958526	0.0958526	-	-	0.00365897	0.00365809	-	-	0.00371512	0.00373226	-	-	433.208	328.672	-	-	327.426	328.158	-	-	0.731629	0.143275	0.259265	0.148346
K1	50		0.960069	0.960069	-	-	0.0952214	0.0952214	-	-	0.00366059	0.00365999	-	-	0.00371926	0.00372793	-	-	360.237	349.533	-	-	378.139	394.182	-	-	0.720128	0.141675	0.266824	0.142384
K1	75		0.953819	0.953819	-	-	0.0928775	0.0928775	-	-	0.00366275	0.00366393	-	-	0.00367299	0.00368406	-	-	468.463	564.752	-	-	500.176	626.224	-	-	0.178409	0.0713184	0.0963237	0.0724073
K1	100		0.95	0.95	-	-	0.0902137	0.0902137	-	-	0.00366272	0.00366143	-	-	0.00367617	0.00366489	-	-	333.497	387.447	-	-	345.258	351.268	-	-	0.102867	0.0397355	0.0364528	0.0398075
K1	200		2.16059	2.16059	2.15295	2.15295	0.0911943	0.0911943	0.0911943	0.0911943	0.00369229	0.00368533	0.00369202	0.00368402	0.00369327	0.0037231	0.00374119	0.00392482	146.802	143.174	144.503	140.636	139.028	144.663	152.506	169.834	0.435423	0.0869509	0.0629069	0.086972
K1	300		1.83785	1.83889	1.83785	1.83785	0.0853477	0.0821284	0.0853477	0.080412	0.00369225	0.00368501	0.00368797	0.00368372	0.00368159	0.00383375	0.00369606	0.00370685	101.09	153.908	92.5749	159.656	102.422	108.469	151.755	103.372	0.289215	0.0629755	0.0359401	0.0635435
K1	740		1.83715	1.83715	1.83715	1.83715	0.0760904	0.0760904	0.0760904	0.0760904	0.00368627	0.00368244	0.00369283	0.00368445	0.00370012	0.00379382	0.00403925	0.00411666	100.334	158.519	161.522	150.804	74.4075	72.9238	68.4592	78.5272	1.69877	0.200324	0.190983	0.213225
K1	1000		1.90816	1.90816	1.90816	1.90816	0.0733324	0.0733324	0.0686661	0.0733324	0.00368424	0.00366727	0.00368806	0.00368996	0.00377886	0.00382888	0.00370671	0.00370927	118.693	117.216	59.9	61.7743	93.6019	70.1091	83.6616	78.4936	0.562805	0.0490229	0.0486389	0.0509379
SS1	5		1.06215	1.06354	1.06493	-	0.0426447	0.0426447	0.0426447	-	0.0036615	0.00366486	0.00366843	-	0.00373327	0.00371887	0.00369299	-	295.11	276.178	302.907	-	224.507	369.801	383.904	-	1.20885	0.157674	0.373214	0.173349
SS1	15		1.06597	1.06701	1.0684	-	0.042624	0.042624	0.042624	-	0.00369174	0.00367796	0.00366387	-	0.0036815	0.00369562	0.00367507	-	284.464	289.685	277.093	-	278.937	237.257	261.842	-	BDL	-	BDL	-
SS1	25		1.06944	1.07049	1.07188	-	0.0425934	0.0425934	0.0425934	-	0.00366981	0.00366324	0.00367938	-	0.00383529	0.00398277	0.00375547	-	400.342	297.347	292.194	-	236.856	228.394	249.778	-	4.48824	0.796353	1.27534	0.846066
SS1	50		1.07396	1.07708	1.07847	-	0.0424338	0.0424338	0.0424338	-	0.00368846	0.00366387	0.00368542	-	0.0037033	0.00380895	0.00369712	-	283.399	274.805	260.312	-	239.59	216.19	239.089	-	1.37113	0.389765	0.345842	0.391295
SS1	75		1.08021	1.0816	1.08299	-	0.0407108	0.0407108	0.0407108	-	0.0036641	0.00366535	0.00367642	-	0.00371645	0.00371361	0.00369278	-	353.829	334.165	287.448	-	293.914	344.68	291.638	-	0.973134	0.118906	0.309079	0.12241
SS1	100		1.08472	1.08611	1.08646	-	0.0390752	0.0390752	0.0390752	-	0.00366981	0.00367396	0.00366689	-	0.00367304	0.00367275	0.00367485	-	316.807	397.901	300.399	-	364.96	308.502	325.365	-	BDL	-	BDL	-
SS1	120		1.02708	1.02743	1.02743	-	0.0955731	0.0955731	0.0955731	-	0.00367122		0.0036728	-	0.00367672	0.00375976	0.00369949	-	146.035	0	275.016	-	158.181	128.459	133.397	-	0.423464	0.0639291	0.0593617	0.0739131
SS1	150		1.02743	1.02743	1.02743	-	0.0932566	0.0932566	0.0932566	-	0.0036812	0.00367857	0.00367733	-	0.00369348	0.00371615	0.00368089	-	65.1085	60.5028	139.375	-	100.706	73.5454	108.777	-	0.193473	0.0179029	0.017671	0.018851
SS1	200	24h	1.17361	1.17465	1.17674	-	0.15	0.15	0.15	-	0.00367843	0.00367997	0.00367976	-	0.00377455	0.00367967	0.00372328	-	64.3834	45.0991	46.4633	-	52.5948	51.2635	59.3129	-	0.340651	0.0173169	0.0196035	0.0175932
SS1	200	48h	2.03889	2.04097	2.03819	-	0.15	0.15	0.15	-	0.00367843	0.00367997	0.00367976	-	0.00375273	0.00397498	0.0036785	-	64.3834	45.0991	46.4633	-	63.7913	84.1164	58.6226	-
SS1	200	FAA - 0.2 µmol C L-1	0.866319	0.864236	0.864583	-	0.15	0.15	0.15	-	0.00367843	0.00367997	0.00367976	-	0.00367632	0.00368113	0.00367977	-	64.3834	45.0991	46.4633	-	96.4844	56.5271	95.9707	-	BDL	-	BDL	-
SS1	200	FAA - 0.4 µmol C L-1	0.866667	0.867014	0.867708	-	0.15	0.15	0.15	-	0.00367843	0.00367997	0.00367976	-	0.00368151	0.00367648	0.00367808	-	64.3834	45.0991	46.4633	-	87.1365	113.241	69.7236	-	BDL	-	BDL	-
SS1	200	FAA - 2 µmol C L-1	0.868056	0.869444	0.867708	-	0.15	0.15	0.15	-	0.00367843	0.00367997	0.00367976	-	0.00368193	0.00368068	0.00368499	-	64.3834	45.0991	46.4633	-	232.164	209.575	225.878	-	0.0247653	0.00257923	0.0033993	0.0034737
SS1	200	FAA - 10 µmol C L-1	0.884028	0.883681	0.875347	-	0.15	0.15	0.15	-	0.00367843	0.00367997	0.00367976	-	0.00368314	0.00368301	0.00369098	-	64.3834	45.0991	46.4633	-	781.414	808.948	747.208	-	0.0490331	0.0150979	0.0203775	0.0247065
SS1	200	FAA - 20 µmol C L-1	0.886458	0.882639	0.894444	-	0.15	0.15	0.15	-	0.00367843	0.00367997	0.00367976	-	0.00367997	0.00368226	0.00367764	-	64.3834	45.0991	46.4633	-	1468.04	1196.34	1280.3	-	0.00440067	0.012922	0.00300758	0.0132814
SS1	300	24h	1.05104	1.05139	1.05139	-	0.15	0.15	0.15	-	0.00368006	0.00368073	0.00370068	-	0.00391284	0.00367931	0.00378512	-	78.5131	44.7661	54.5414	-	45.6423	78.4471	37.1133	-	0.394175	0.0223216	0.0229726	0.0231617
SS1	300	48h	2.06042	2.06354	2.06319	-	0.15	0.15	0.15	-	0.00368006	0.00368073	0.00370068	-	0.00369054	0.00369509	0.00376996	-	78.5131	44.7661	54.5414	-	77.6129	82.9864	81.425	-
SS1	500	24h	1.04826	1.04792	1.04826	-	0.15	0.15	0.15	-	0.00376414	0.00368295	0.00368465	-	0.0036896	0.00368566	0.0036893	-	37.1753	37.5333	26.6843	-	33.4518	43.6623	51.1444	-	BDL	-	BDL	-
SS1	500	48h	2.06146	2.06146	2.06076	-	0.159426	0.150049	0.166918	-	0.00376414	0.00368295	0.00368465	-	0.00368399	0.0036834	0.00380547	-	37.1753	37.5333	26.6843	-	57.2181	55.264	54.0661	-
SS1	700	24h	0.977431	0.977083	0.976736	-	0.15	0.15	0.15	-	0.0036864	0.00372651	0.00368271	-	0.00368372	0.00378699	0.00372495	-	29.6472	52.1351	32.1292	-	54.715	39.0905	37.429	-	0.257411	0.0110234	0.0107042	0.0111871
SS1	700	48h	2.06736	2.06875	2.06979	-	0.156666	0.151481	0.167137	-	0.0036864	0.00372651	0.00368271	-	0.003708	0.00391209	0.0037459	-	29.6472	52.1351	32.1292	-	51.2085	51.2184	36.777	-
SS1	700	FAA - 0.2 µmol C L-1	2.09896	2.08993	2.09931	-	0.15	0.15	0.15	-	0.0036864	0.00372651	0.00368271	-	0.00369093	0.00369249	0.00367952	-	29.6472	52.1351	32.1292	-	89.2526	77.1044	63.93	-	BDL	-	BDL	-
SS1	700	FAA - 0.4 µmol C L-1	2.10938	2.11007	2.11076	-	0.15	0.15	0.15	-	0.0036864	0.00372651	0.00368271	-	0.00367909	0.00368557	0.00371303	-	29.6472	52.1351	32.1292	-	78.5528	109.53	96.7925	-	BDL	-	BDL	-
SS1	700	FAA - 2 µmol C L-1	2.11146	2.11215	2.11285	-	0.15	0.15	0.15	-	0.0036864	0.00372651	0.00368271	-	0.00368228	0.00370315	0.00367782	-	29.6472	52.1351	32.1292	-	81.388	42.4596	70.001	-	BDL	-	BDL	-
SS1	700	FAA - 10 µmol C L-1	2.11354	2.12049	2.11424	-	0.15	0.15	0.15	-	0.0036864	0.00372651	0.00368271	-	0.00368943	0.00370307	0.00368737	-	29.6472	52.1351	32.1292	-	96.1146	130.283	72.944	-	BDL	-	BDL	-
SS1	700	FAA - 20 µmol C L-1	2.11493	2.11562	2.11597	-	0.15	0.15	0.15	-	0.0036864	0.00372651	0.00368271	-	0.00371556	0.00370976	0.0037448	-	29.6472	52.1351	32.1292	-	148.064	55.6519	70.6019	-	BDL	-	BDL	-
SS1	1000	24h	1.06806	1.0684	1.06806	-	0.15	0.15	0.15	-	0.00368974	0.00368613	0.00373342	-	0.00368514	0.00369097	0.00368251	-	25.7712	24.327	30.8172	-	71.5704	75.3795	45.6395	-	BDL	-	BDL	-
SS1	1000	48h	2.14965	2.15174	2.15382	-	0.15	0.15	0.15	-	0.00368974	0.00368613	0.00373342	-	0.0036858	0.00372301	0.00368588	-	25.7712	24.327	30.8172	-	33.481	34.1127	33.7891	-
SS1	4000	24h	0.920139	0.919444	0.918056	-	0.144876	0.150344	0.14043	-	0.00369282	0.00368555	0.00375713	-	0.00368239	0.00368936	0.00368672	-	9.28081	13.633	14.0484	-	22.0674	34.4746	21.9229	-	BDL	-	BDL	-
SS1	4000	48h	2.00799	2.00764	2.00799	-	0.127393	0.111226	0.136282	-	0.00369282	0.00368555	0.00375713	-	0.00368568	0.00374945	0.00369668	-	9.28081	13.633	14.0484	-	19.7509	27.7285	26.0938	-
WXS	5	24h	1.03507	1.03472	1.03472	-	0.121123	0.114346	0.0832705	-	0.00366039	0.00365939	0.00365974	-	0.00367744	0.00368324	0.00367301	-	267.331	301.766	322.453	-	268.598	272.713	492.057	-	0.185701	0.0217309	0.0562115	0.0231512
WXS	5	48h	1.97049	1.97083	1.97014	-	0.144716	0.166977	0.172491	-	0.00366039	0.00365939	0.00365974	-	0.00371073	0.00376949	0.00368703	-	267.331	301.766	322.453	-	316.382	269.302	247.115	-
WXS	200	24h	1.10139	1.10208	1.10243	-	0.149752	0.148725	0.160788	-	0.00368033	0.00368056	0.00368264	-	0.00367874	0.00368252	0.00368437	-	61.6511	60.1272	62.6185	-	76.7945	95.72	72.9922	-	0.0536912	0.00495907	0.00388099	0.00501347
WXS	200	48h	2.12431	2.12431	2.12431	-	0.16737	0.170261	0.167173	-	0.00368033	0.00368056	0.00368264	-	0.00371249	0.0037668	0.00367241	-	61.6511	60.1272	62.6185	-	97.2673	78.4567	73.7373	-
WXS	200	FAA - 0.2 µmol C L-1	2.12431	2.12396	2.12431	-	0.15	0.15	0.15	-	0.00368033	0.00368056	0.00368264	-	0.00368048	0.00368088	0.00368394	-	61.6511	60.1272	62.6185	-	117.786	106.752	105.204	-	BDL	-	BDL	-
WXS	200	FAA - 0.4 µmol C L-1	2.12465	2.12431	2.12431	-	0.15	0.15	0.15	-	0.00368033	0.00368056	0.00368264	-	0.00377822	0.00370944	0.00369221	-	61.6511	60.1272	62.6185	-	81.8023	85.7938	99.2888	-	0.146202	0.0110685	0.0109964	0.0113177
WXS	200	FAA - 2 µmol C L-1	2.12431	2.12396	2.12292	-	0.15	0.15	0.15	-	0.00368033	0.00368056	0.00368264	-	0.00368438	0.00368224	0.00368171	-	61.6511	60.1272	62.6185	-	225.068	410.763	230.94	-	BDL	-	BDL	-
WXS	200	FAA - 10 µmol C L-1	2.12986	2.13889	2.14306	-	0.15	0.15	0.15	-	0.00368033	0.00368056	0.00368264	-	0.00369052	0.00368941	0.00369125	-	61.6511	60.1272	62.6185	-	792.954	815.128	764.252	-	0.0294756	0.00248004	0.0125602	0.0120421
WXS	200	FAA - 20 µmol C L-1	2.17118	2.22222	2.15347	-	0.15	0.15	0.15	-	0.00368033	0.00368056	0.00368264	-	0.00368466	0.00368299	0.00368494	-	61.6511	60.1272	62.6185	-	1062.48	1132.21	1120.63	-	BDL	-	BDL	-
WXS	855	24h	1.14375	1.14375	1.14306	-	0.15	0.15	0.15	-	0.00368494	0.00368448	0.00368851	-	0.00372925	0.00368099	0.00368431	-	37.1405	30.7955	29.9255	-	84.9246	95.8937	47.9902	-	0.0600258	0.0059295	0.0035487	0.00609441
WXS	855	48h	2.14757	2.14757	2.14757	-	0.15	0.15	0.15	-	0.00368494	0.00368448	0.00368851	-	0.00374403	0.00368086	0.00367743	-	37.1405	30.7955	29.9255	-	100.821	76.6966	122.792	-
WXS	855	FAA - 0.2 µmol C L-1	2.14792	2.14792	2.14792	-	0.15	0.15	0.15	-	0.00368494	0.00368448	0.00368851	-	0.00367877	0.0036853	0.00368384	-	37.1405	30.7955	29.9255	-	57.5057	66.5537	54.5336	-	BDL	-	BDL	-
WXS	855	FAA - 0.4 µmol C L-1	2.14792	2.14792	2.14826	-	0.15	0.15	0.15	-	0.00368494	0.00368448	0.00368851	-	0.00371705	0.00368035	0.00370537	-	37.1405	30.7955	29.9255	-	52.8913	44.8576	56.4923	-	0.0475585	0.00253153	0.00199827	0.00258736
WXS	855	FAA - 2 µmol C L-1	2.14826	2.14826	2.14826	-	0.15	0.15	0.15	-	0.00368494	0.00368448	0.00368851	-	0.00367406	0.00370164	0.0036877	-	37.1405	30.7955	29.9255	-	148.947	38.2173	74.7259	-	0.00580339	0.00266376	0.000347964	0.00267749
WXS	855	FAA - 10 µmol C L-1	2.15347	2.14792	2.14792	-	0.15	0.15	0.15	-	0.00368494	0.00368448	0.00368851	-	0.00366985	0.00368779	0.00367798	-	37.1405	30.7955	29.9255	-	283.26	106.602	90.8789	-	BDL	-	BDL	-
WXS	855	FAA - 20 µmol C L-1	2.14757	2.14722	2.14687	-	0.15	0.15	0.15	-	0.00368494	0.00368448	0.00368851	-	0.00369873	0.00368175	0.00367432	-	37.1405	30.7955	29.9255	-	80.7484	75.147	66.8393	-	-0.0033237	0.00216087	-0.000177594	0.00216227

## Sheet: References
Benavides, M., Bonnet, S., Hernández, N., Martínez-Pérez, A. M., Nieto-Cid, M., Álvarez-Salgado, X. A., Baños, I., Montero, M. F., Mazuecos, I. P., Gasol, J. M., Osterholz, H., Dittmar, T., Berman-Frank, I. and Arístegui, J.: Basin-wide N2 fixation in the deep waters of the Mediterranean Sea, Global Biogeochem Cy, 30(6), 952–961, https://doi.org/10.1002/2015gb005326, 2016.
Benavides, M., Shoemaker, K. M., Moisander, P. H., Niggemann, J., Dittmar, T., Duhamel, S., Grosso, O., Pujo-Pay, M., Hélias-Nunige, S., Fumenia, A. and Bonnet, S.: Aphotic N2 fixation along an oligotrophic to ultraoligotrophic transect in the western tropical South Pacific Ocean, Biogeosciences, 15(10), 3107–3119, https://doi.org/10.5194/bg-15-3107-2018, 2018.
Bonnet, S., Dekaezemacker, J., Turk-Kubo, K. A., Moutin, T., Hamersley, R. M., Grosso, O., Zehr, J. P. and Capone, D. G.: Aphotic N2 Fixation in the Eastern Tropical South Pacific Ocean, Plos One, 8(12), e81265, https://doi.org/10.1371/journal.pone.0081265, 2013.
Hamersley, M., Turk, K., Leinweber, A., Gruber, N., Zehr, J., Gunderson, T. and Capone, D.: Nitrogen fixation within the water column associated with two hypoxic basins in the Southern California Bight, Aquat Microb Ecol, 63(2), 193–205, https://doi.org/10.3354/ame01494, 2011.
Löscher, C. R., Bourbonnais, A., Dekaezemacker, J., Charoenpong, C. N., Altabet, M. A., Bange, H. W., Czeschel, R., Hoffmann, C. and Schmitz, R.: N2 fixation in eddies of the eastern tropical South Pacific Ocean, Biogeosciences, 13(10), 2889–2899, https://doi.org/10.5194/bg-13-2889-2016, 2016.
Selden, C. R., Mulholland, M. R., Bernhardt, P. W., Widner, B., Macías‐Tapia, A., Ji, Q. and Jayakumar, A.: Dinitrogen Fixation Across Physico‐Chemical Gradients of the Eastern Tropical North Pacific Oxygen Deficient Zone, Global Biogeochem Cy, 33(9), 1187–1202, https://doi.org/10.1029/2019gb006242, 2019.
